# Supplementary material for: Phylogenomics of palearctic Formica species suggests a single origin of temporary parasitism and gives insights to the evolutionary pathway toward slave-making behaviour
Source: PubMed Central journal article supplement (PMC5872393; doi:10.1186/s12862-018-1159-4), 2018-03-28
Supplement: 12862_2018_1159_MOESM1_ESM.pdf [file 12862_2018_1159_MOESM1_ESM.pdf]

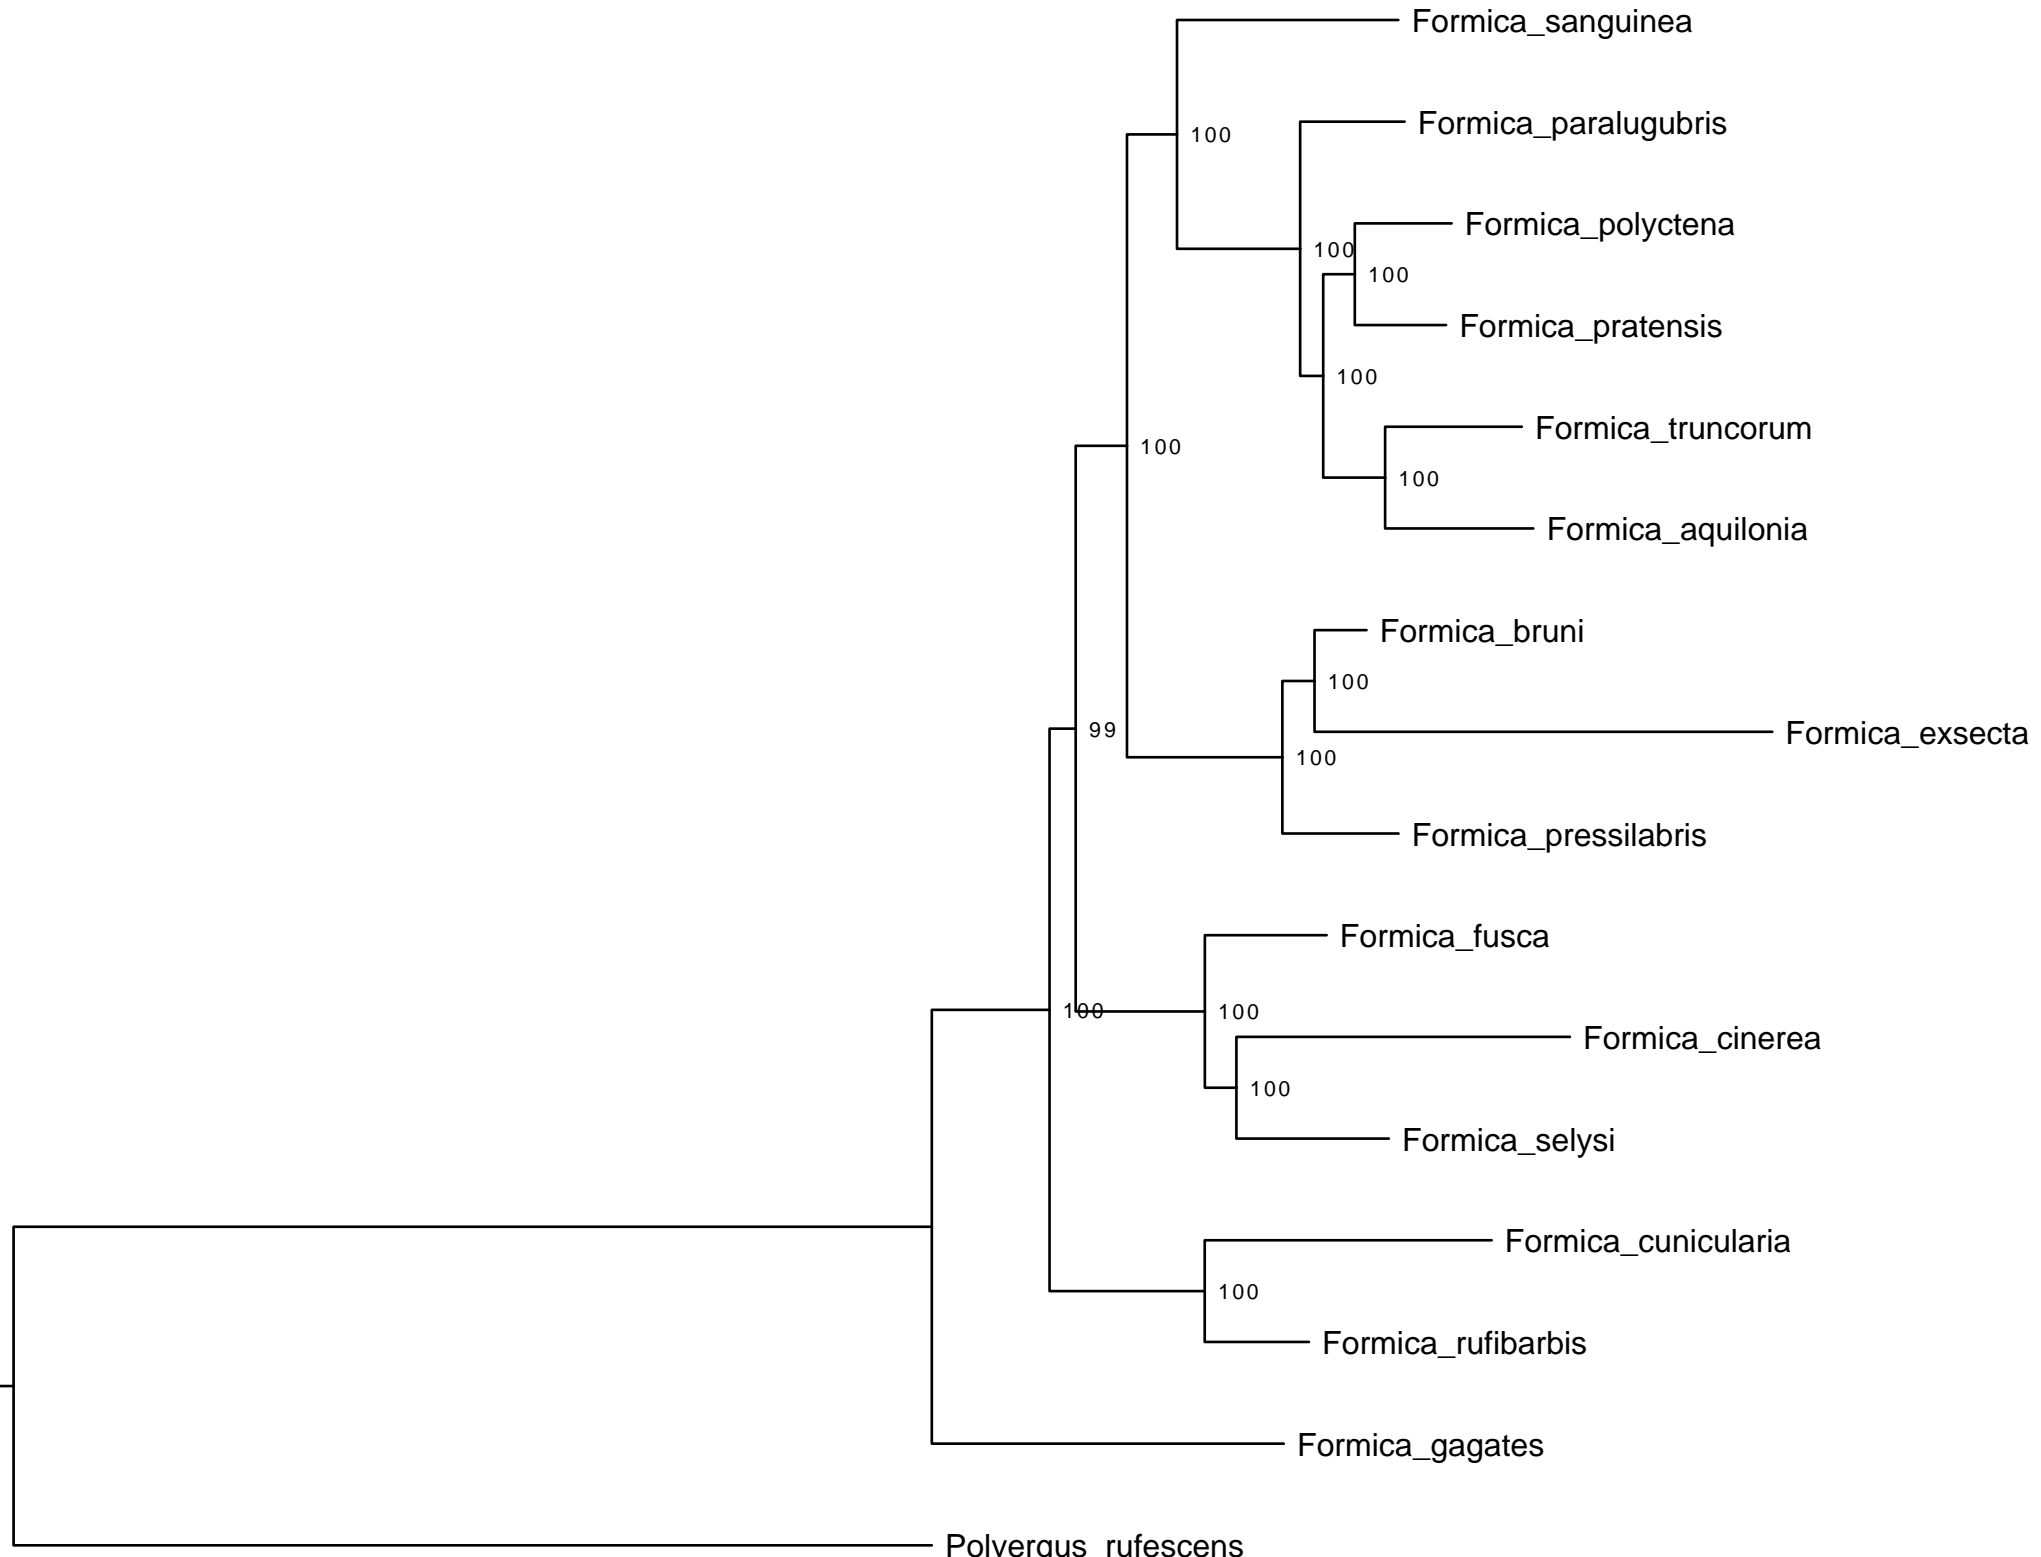

0.004
